# Supplementary material
Source: Springer Nature journal article supplement (https://www.springermedizin.de/resource/supplementary/12879_2011_1884_MOESM6_ESM.pdf/9443992)

Electrode: FCz

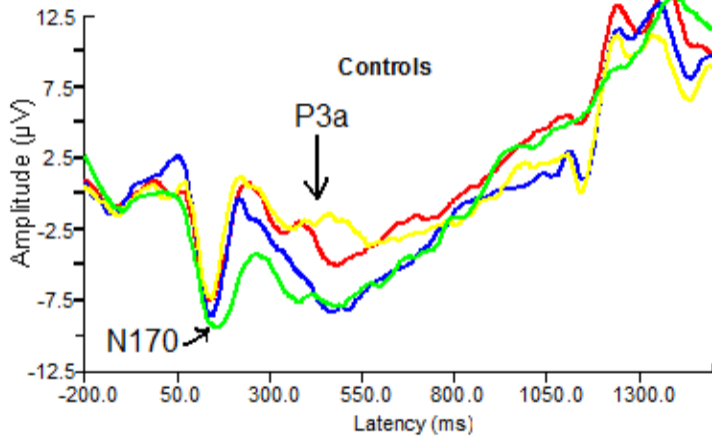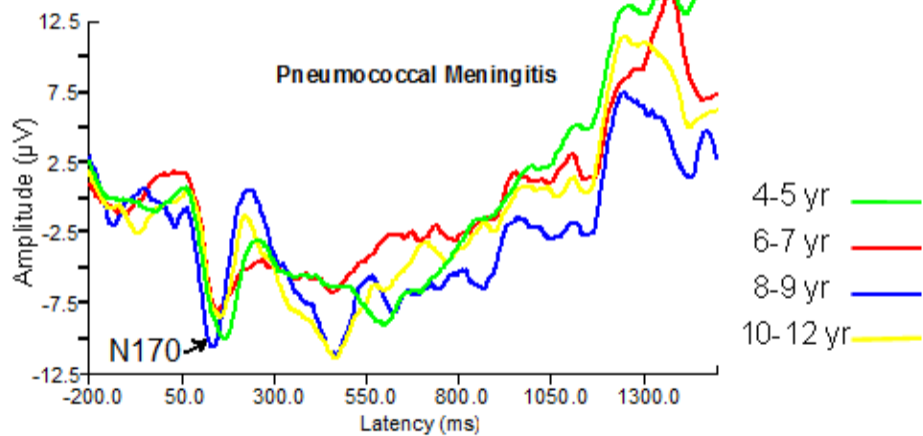

Supplement: MOESM6 [file 9443992]
